# Supplementary material for: Enjoyment of Physical Activity—Not MVPA during Physical Education—Predicts Future MVPA Participation and Sport Self-Concept
Source: MDPI journal article supplement (doi:10.3390/sports9090128), 2021-09-10
Supplement: s1 [file s1]

## Article

# Enjoyment of Physical Activity—Not MVPA during Physical Education—Predicts Future MVPA Participation and Sport Self-Concept

Jared D. Ramer <sup>1\*</sup>, Natalie E. Houser <sup>2</sup>, Robert J. Duncan <sup>3</sup>, and Eduardo E. Bustamante <sup>1</sup>

<sup>1</sup> College of Applied Health Sciences, University of Illinois at Chicago, Chicago, IL 60607, USA, ebusta2@uic.edu

<sup>2</sup> College of Kinesiology, University of Saskatchewan, Saskatoon S7N 5B2, Canada; natalie.houser@usask.ca

<sup>3</sup> College of Health and Human Sciences, Purdue University, West Lafayette, IN 47907, USA; duncan99@purdue.edu

\* Correspondence: jramer2@uic.edu

**Citation:** Ramer J. D., Houser N. E., Duncan R. J., Bustamante E. E. Enjoyment of Physical Activity—not MVPA during Physical Education—Predicts Future MVPA Participation and Sport Self-Concept. *Sports* **2021**, *9*, 128. <https://doi.org/10.3390/sports9090128>

Academic Editor: Daniel Almeida Marinho

Received: 31 July 2021

Accepted: 6 September 2021

Published: 10 September 2021

**Publisher's Note:** MDPI stays neutral with regard to jurisdictional claims in published maps and institutional affiliations.

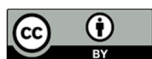

**Copyright:** © 2021 by the authors. Submitted for possible open access publication under the terms and conditions of the Creative Commons Attribution (CC BY) license (<https://creativecommons.org/licenses/by/4.0/>).

**Table S1.** Correlation Matrix of All Study Variables.

|                                            | G5<br>Enjoy<br>PA | G5 PE<br>MVPA  | G5<br>PE %<br>MVPA | G5 PE<br>Minutes<br>/week | G5<br>Weekd<br>ay<br>MVPA | G6<br>Sport<br>Self-<br>Conce<br>pt | G6<br>Enjoy<br>PA | G6<br>MVPA<br>All<br>Days | G6<br>BMI      | G5<br>BMI      | Sex       | Limited<br>Physic<br>al<br>Functi<br>oning |
|--------------------------------------------|-------------------|----------------|--------------------|---------------------------|---------------------------|-------------------------------------|-------------------|---------------------------|----------------|----------------|-----------|--------------------------------------------|
| G5<br>Enjoy<br>PA                          | —                 |                |                    |                           |                           |                                     |                   |                           |                |                |           |                                            |
| G5 PE<br>MVPA                              | 0.0<br>57         | —              |                    |                           |                           |                                     |                   |                           |                |                |           |                                            |
| G5<br>PE %<br>MVPA                         | 0.0<br>65         | 0.6<br>33 ***  | —                  |                           |                           |                                     |                   |                           |                |                |           |                                            |
| G5 PE<br>Minute<br>s/week                  | 0.0<br>11         | 0.7<br>46 ***  | 0.0<br>54          | —                         |                           |                                     |                   |                           |                |                |           |                                            |
| G5<br>Weekd<br>ay<br>MVPA                  | 0.1<br>84 ***     | 0.0<br>74 *    | 0.0<br>60          | 0.04<br>5                 | —                         |                                     |                   |                           |                |                |           |                                            |
| G6<br>Sport<br>Self-Co<br>ncept            | 0.3<br>51 ***     | 0.0<br>57      | 0.0<br>80 *        | 0.00<br>1                 | 0.1<br>20 ***             | —                                   |                   |                           |                |                |           |                                            |
| G6<br>Enjoy<br>PA                          | 0.0<br>34         | −0.<br>00<br>7 | −0.<br>02<br>5     | 0.00<br>8                 | 0.0<br>20                 | 0.0<br>75 *                         | —                 |                           |                |                |           |                                            |
| G6<br>MVPA<br>All<br>Days                  | 0.1<br>94 ***     | 0.0<br>50      | 0.0<br>94 *        | 0.00<br>2                 | 0.4<br>07 ***             | 0.1<br>85 ***                       | 0.1<br>98 ***     | —                         |                |                |           |                                            |
| G6 BMI                                     | −0.<br>14 ***     | −0.<br>10 **   | −0.<br>06<br>2     | −0.0<br>78 *              | −0.<br>14 ***             | −0.<br>01<br>1                      | −0.<br>02<br>1    | −0.<br>09<br>7 *          | —              |                |           |                                            |
| G5 BMI                                     | −0.<br>13 ***     | −0.<br>08 *    | −0.<br>05<br>5     | −0.0<br>62                | −0.<br>14 ***             | −0.<br>00<br>3                      | −0.<br>15 ***     | −0.<br>11 **              | 0.9<br>46 ***  | —              |           |                                            |
| Sex                                        | 0.0<br>21         | −0.<br>09 **   | −0.<br>08 *        | −0.0<br>45                | −0.<br>21 ***             | −0.<br>08 **                        | −0.<br>03<br>5    | −0.<br>27 ***             | −0.<br>04<br>3 | −0.<br>05<br>7 | —         |                                            |
| Limited<br>Physica<br>l<br>Functio<br>ning | −0.<br>05<br>8    | 0.0<br>06      | 0.0<br>04          | −0.0<br>05                | 0.0<br>03                 | −0.<br>02<br>1                      | 0.0<br>12         | −0.<br>01<br>7            | 0.0<br>64      | 0.0<br>56      | 0.0<br>10 | —                                          |

Pearson Correlation. \*  $p < .05$ , \*\*  $p < .01$ , \*\*\*  $p < .001$ .

**Table S2.** Unstandardized and Standardized Estimates Within Structural Equation Model.

| Interaction                                         |                       | Estimate | S.E.  | C.R.   | P-value | β      |
|-----------------------------------------------------|-----------------------|----------|-------|--------|---------|--------|
| Independent Variables                               |                       |          |       |        |         |        |
| G5 Enjoy PA→                                        | G5 Weekday MVPA       | 8.452    | 1.626 | 5.198  | ***     | 0.173  |
|                                                     | G6 Sport Self-Concept | 0.498    | 0.045 | 11.121 | ***     | 0.347  |
|                                                     | G6 Enjoy PA           | 0.558    | 0.03  | 18.61  | ***     | 0.538  |
|                                                     | G6 MVPA All Days      | 5.739    | 1.611 | 3.563  | ***     | 0.125  |
|                                                     | G6 BMI                | −0.071   | 0.074 | −0.971 | 0.332   | −0.012 |
| PE MVPA minutes/week →                              | G5 Weekday MVPA       | 0.081    | 0.065 | 1.244  | 0.213   | 0.044  |
|                                                     | G6 Sport Self-Concept | 0.002    | 0.002 | 1.058  | 0.29    | 0.035  |
|                                                     | G6 Enjoy PA           | 0.000    | 0.001 | .251   | 0.802   | 0.008  |
|                                                     | G6 MVPA All Days      | −0.011   | 0.063 | −0.169 | 0.866   | −0.006 |
|                                                     | G6 BMI                | −0.004   | 0.003 | −1.491 | 0.136   | −0.019 |
| Mediator                                            |                       |          |       |        |         |        |
| G5 PAM weekday MVPA →                               | G6 Sport Self-Concept | 0.001    | 0.001 | 1.085  | 0.278   | 0.037  |
|                                                     | G6 Enjoy PA           | 0.000    | 0.001 | 0.558  | 0.577   | 0.018  |
|                                                     | G6 MVPA All Days      | 0.317    | 0.034 | 9.181  | ***     | 0.338  |
|                                                     | G6 BMI                | 0.000    | 0.002 | 0.017  | 0.987   | 0.000  |
| Control                                             |                       |          |       |        |         |        |
| G5 BMI →                                            | G5 Weekday MVPA       | −1.171   | 0.32  | −3.659 | ***     | −0.129 |
|                                                     | G6 Sport Self-Concept | 0.015    | 0.009 | 1.707  | 0.088   | 0.056  |
|                                                     | G6 Enjoy PA           | −0.018   | 0.006 | −3.04  | 0.002   | −0.093 |
|                                                     | G6 MVPA All Days      | −0.385   | 0.312 | −1.234 | 0.217   | −0.045 |
|                                                     | G6 BMI                | 1.044    | 0.013 | 78.535 | ***     | 0.943  |
| Sex →                                               | G5 Weekday MVPA       | −18.128  | 2.65  | −6.84  | ***     | −0.223 |
|                                                     | G6 Sport Self-Concept | −0.185   | 0.073 | −2.537 | 0.011   | −0.078 |
|                                                     | G6 Enjoy PA           | −0.089   | 0.05  | −1.791 | 0.073   | −0.052 |
|                                                     | G6 MVPA All Days      | −15.912  | 2.645 | −6.015 | ***     | −0.209 |
|                                                     | G6 BMI                | 0.18     | 0.12  | 1.497  | 0.134   | 0.018  |
| Limited Physical Function →                         | G5 Weekday MVPA       | 1.497    | 3.225 | 0.464  | 0.642   | 0.015  |
|                                                     | G6 Sport Self-Concept | −0.023   | 0.086 | −0.27  | 0.787   | −0.008 |
|                                                     | G6 Enjoy PA           | 0.042    | 0.058 | 0.719  | 0.472   | 0.02   |
|                                                     | G6 MVPA All Days      | −0.717   | 3.109 | −0.23  | 0.818   | −0.008 |
|                                                     | G6 BMI                | −0.027   | 0.141 | −0.189 | 0.85    | −0.002 |
| Covariances                                         |                       |          |       |        |         |        |
| Interactions                                        |                       | Estimate | S.E.  | C.R.   | P-value | Corr.  |
| G5 Enjoy ↔ PE MVPA minutes/week                     |                       | 1.078    | 0.638 | 1.69   | 0.091   | 0.059  |
| G5 Enjoy ↔ G5 BMI                                   |                       | −0.51    | 0.128 | −3.979 | ***     | −0.138 |
| G5 Enjoy ↔ Sex                                      |                       | 0.01     | 0.013 | 0.765  | 0.445   | 0.024  |
| G5 Enjoy ↔ Limited Physical Functioning             |                       | −0.016   | 0.011 | −1.459 | 0.144   | −0.047 |
| PE MVPA minutes/week ↔ G5 BMI                       |                       | −9.071   | 3.592 | −2.525 | 0.012   | −0.092 |
| PE MVPA minutes/week ↔ Sex                          |                       | −1.07    | 0.373 | −2.866 | 0.004   | −0.097 |
| PE MVPA minutes/week ↔ Limited Physical Functioning |                       | 0.051    | 3.16  | 0.161  | 0.872   | 0.006  |
| Sport Self-Concept residual ↔ G6 Enjoy PA residual  |                       | 0.229    | 0.027 | 8.363  | ***     | 0.292  |
| Sport Self-Concept residual ↔ G6 MVPA All Days      |                       | 3.566    | 1.359 | 2.625  | 0.009   | 0.096  |

Standard Error (S.E.), Critical Ratio (C.R.), Correlation (Corr.).

Table S3. Model Total Effects.

|                        | G5 Enjoy PA   | G5 PE MVPA    | G5 Weekday MVPA | G5 BMI        | Sex            | Limited Physical Functioning |
|------------------------|---------------|---------------|-----------------|---------------|----------------|------------------------------|
| G5 Weekday MVPA        | 8.452(0.173)  | 0.081(0.044)  | –               | –1.171(0.129) | –18.128(0.223) | 1.497(0.015)                 |
| G6 Sports Self-Concept | 0.507(0.353)  | 0.002(0.036)  | 0.001(0.037)    | 0.014(0.051)  | –0.205(0.086)  | –0.022(0.008)                |
| G6 Enjoy PA            | 0.561(0.541)  | 0.000(0.008)  | 0.000(0.018)    | –0.018(0.096) | –0.096(0.056)  | 0.043(0.021)                 |
| G6 MVPA All Days       | 8.415(0.184)  | 0.015(0.009)  | 0.317(0.338)    | –0.756(0.089) | –21.651(0.285) | –0.243(0.003)                |
| G6 BMI                 | –0.071(0.012) | –0.004(0.019) | 0.000(0.000)    | 1.044(0.943)  | 0.18(0.018)    | –0.027(0.002)                |

Table S4. Model Direct Effects.

|                        | G5 Enjoy PA   | G5 PE MVPA    | G5 Weekday MVPA | G5 BMI        | Sex            | Limited Physical Functioning |
|------------------------|---------------|---------------|-----------------|---------------|----------------|------------------------------|
| G5 Weekday MVPA        | 8.452(0.173)  | 0.081(0.044)  | –               | –1.171(0.129) | –18.128(0.223) | 1.497(0.015)                 |
| G6 Sports Self-Concept | 0.498(0.347)  | 0.002(0.035)  | 0.001(0.037)    | 0.015(0.056)  | –0.185(0.078)  | –0.023(0.008)                |
| G6 Enjoy PA            | 0.558(0.538)  | 0.000(0.008)  | 0.000(0.018)    | –0.018(0.093) | –0.089(0.052)  | 0.042(0.02)                  |
| G6 MVPA All Days       | 5.739(0.125)  | –0.011(0.006) | 0.317(0.338)    | –0.385(0.045) | –15.912(0.209) | –0.717(0.008)                |
| G6 BMI                 | –0.071(0.012) | –0.004(0.019) | 0.000(0.000)    | 1.044(0.943)  | 0.18(0.018)    | –0.027(0.002)                |

Table S5. Model Indirect Effects.

|                        | G5 Enjoy PA  | G5 PE MVPA   | G5 Weekday MVPA | G5 BMI        | Sex           | Limited Physical Functioning |
|------------------------|--------------|--------------|-----------------|---------------|---------------|------------------------------|
| G5 Weekday MVPA        | 0.000(0.000) | 0.000(0.000) | –               | 0.000(0.000)  | 0.000(0.000)  | 0.000(0.000)                 |
| G6 Sports Self-Concept | 0.009(0.006) | 0.000(0.002) | 0.000(0.000)    | –0.001(0.005) | –0.02(0.008)  | 0.002(0.001)                 |
| G6 Enjoy PA            | 0.003(0.003) | 0.000(0.001) | 0.000(0.000)    | 0.000(0.002)  | –0.007(0.004) | 0.001(0.003)                 |
| G6 MVPA All Days       | 2.676(0.058) | 0.026(0.015) | 0.000(0.000)    | –0.371(0.044) | –5.739(0.076) | 0.474(0.005)                 |
| G6 BMI                 | 0.000(0.000) | 0.000(0.000) | 0.000(0.000)    | 0.000(0.000)  | 0.000(0.000)  | 0.000(0.000)                 |
